# Supplementary material
Source: Springer Nature journal article supplement (https://www.springermedizin.de/resource/supplementary/12939_2014_468_MOESM3_ESM.pdf/9551232)

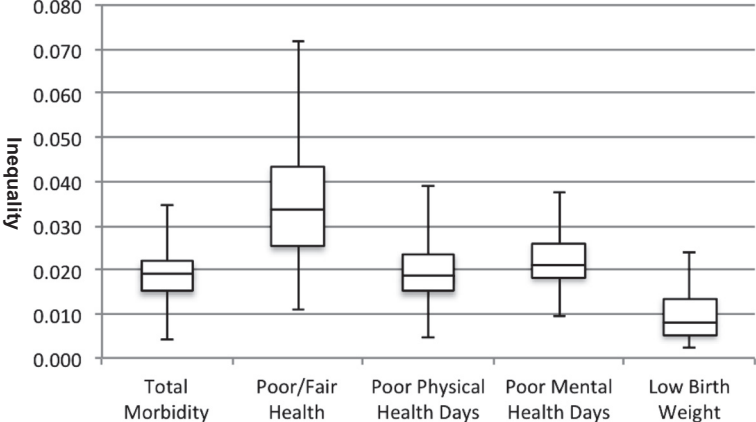

Supplement: MOESM3 [file 9551232]
